# Supplementary material for: High conservation combined with high plasticity: genomics and evolution of Borrelia bavariensis
Source: PubMed Central journal article supplement (PMC7542741; doi:10.1186/s12864-020-07054-3), 2020-10-08

**a**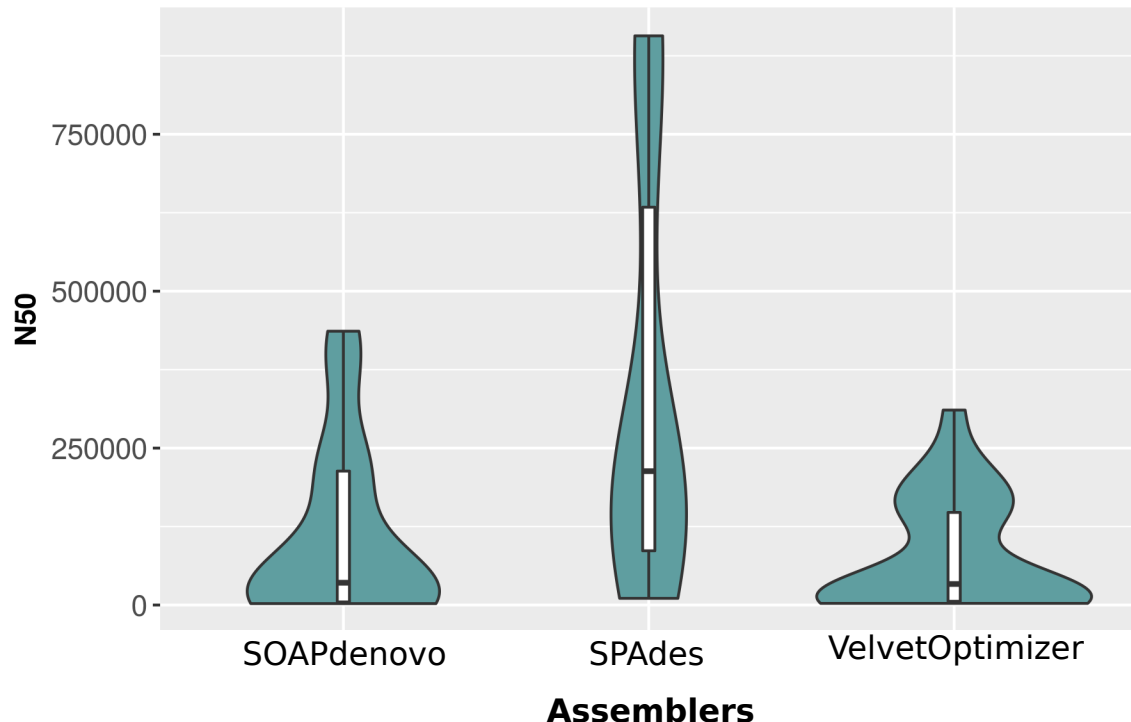**b**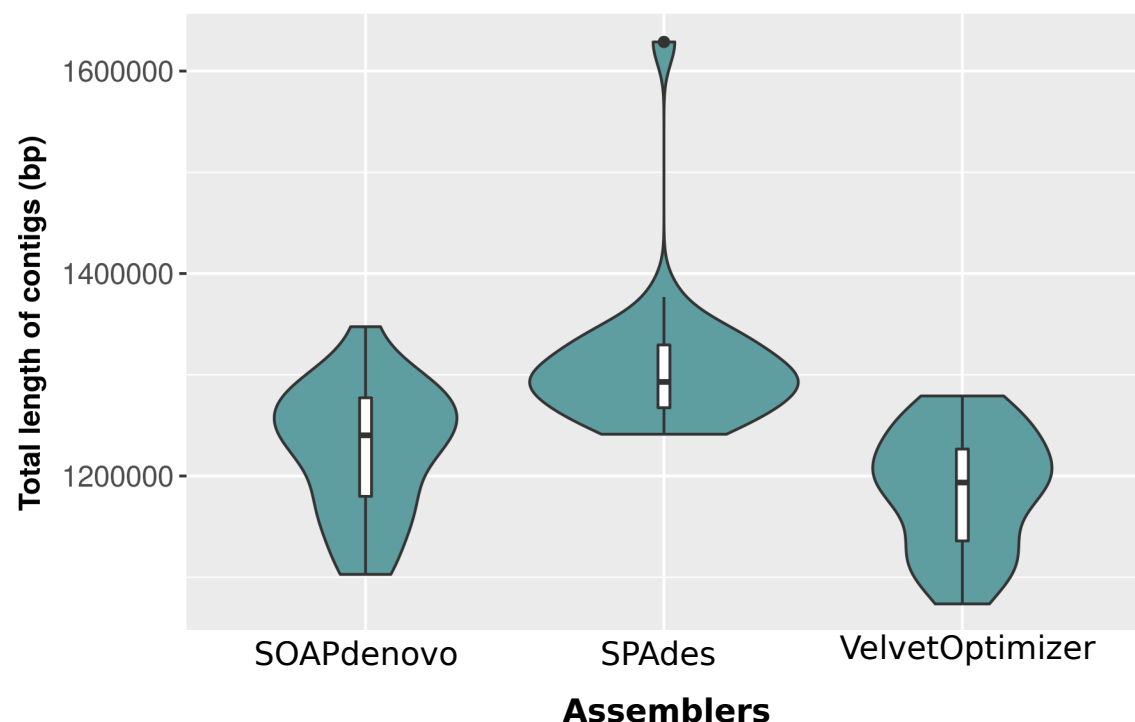

Supplement: 12864_2020_7054_MOESM2_ESM.pdf [file 12864_2020_7054_MOESM2_ESM.pdf]
