# Supplementary material for: High conservation combined with high plasticity: genomics and evolution of Borrelia bavariensis
Source: PubMed Central journal article supplement (PMC7542741; doi:10.1186/s12864-020-07054-3), 2020-10-08

a) Asia

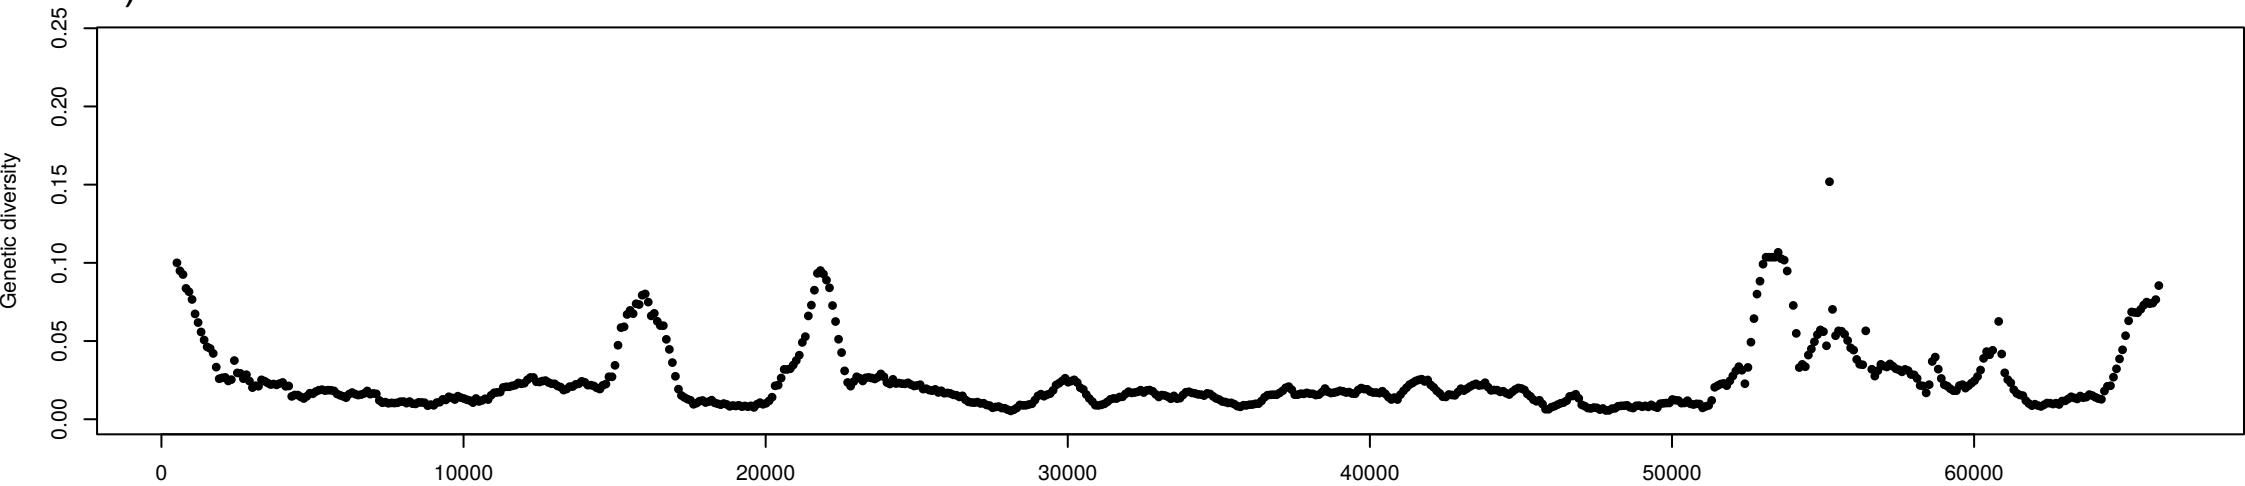

b) Europe

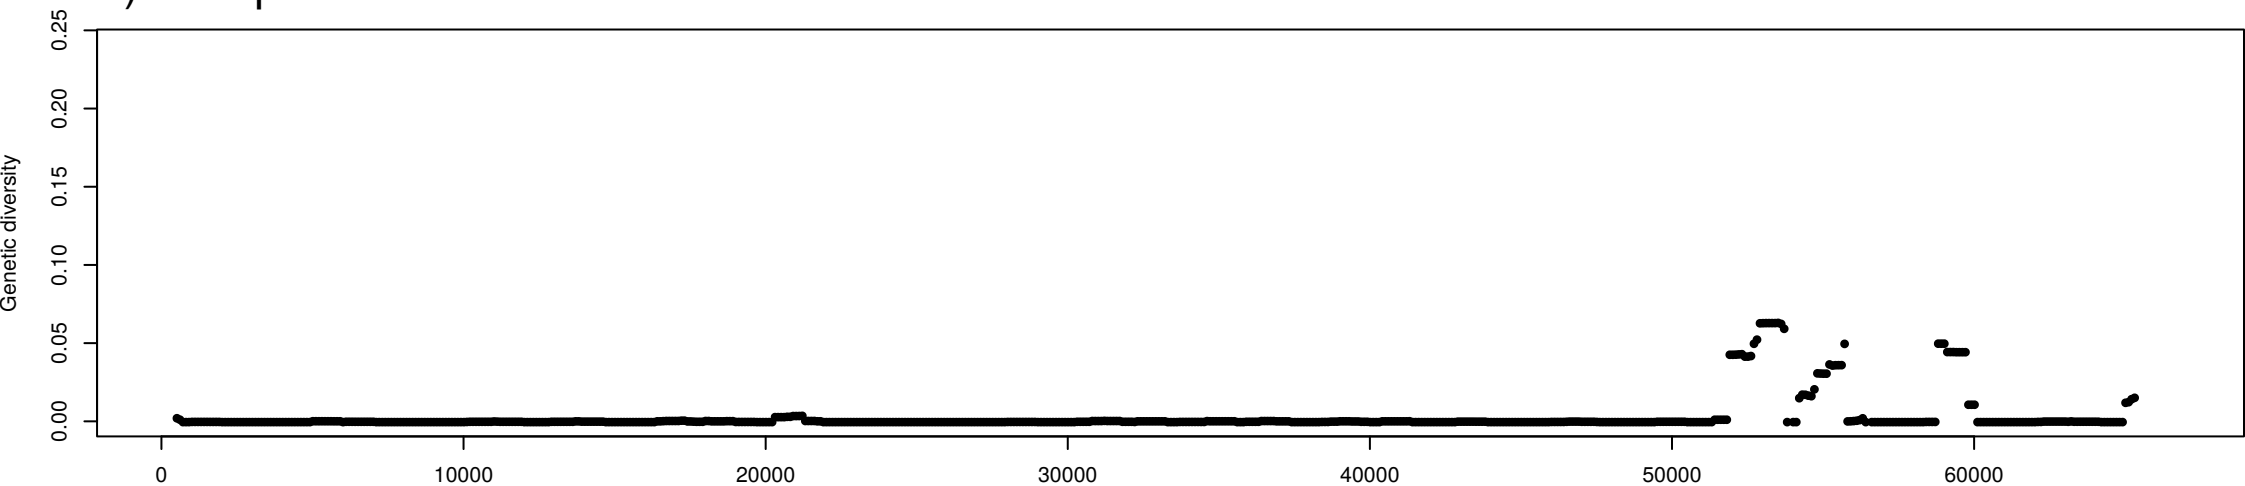

c) All strains

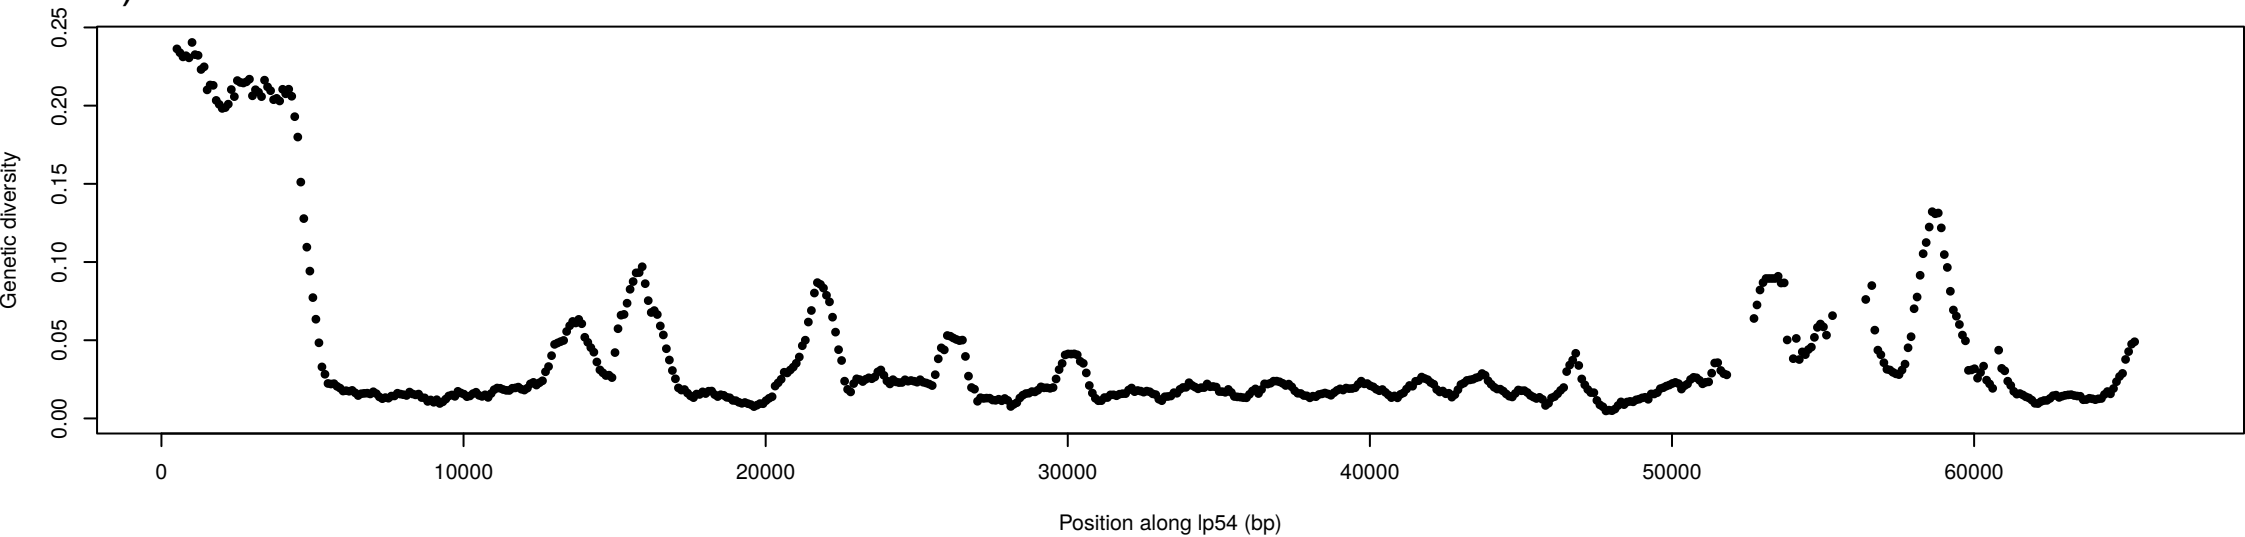

d) Corresponding Anotation

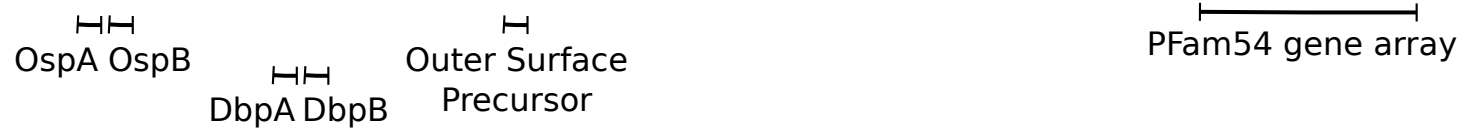

Supplement: 12864_2020_7054_MOESM9_ESM.pdf [file 12864_2020_7054_MOESM9_ESM.pdf]
