# Supplementary material for: High conservation combined with high plasticity: genomics and evolution of Borrelia bavariensis
Source: PubMed Central journal article supplement (PMC7542741; doi:10.1186/s12864-020-07054-3), 2020-10-08
Supplement: 12864_2020_7054_MOESM10_ESM.pdf [file 12864_2020_7054_MOESM10_ESM.pdf]

| Strain    | cp26     | lp54        | lp36        | lp17 | lp17+lp28-4   | lp25        | lp38     | lp56 | lp28-2 | lp28-3      | lp28-4      | lp28-4+cp32-1 | lp28-6 | lp28-7    | lp28-8   | lp28-9   | cp32-1      | cp32-3      | cp32-3+lp25 | cp32-4      | cp32-5      | cp32-6   | cp32-7      | cp32-9      | cp1p32-10   | cp32-11     | cp32-12     |
|-----------|----------|-------------|-------------|------|---------------|-------------|----------|------|--------|-------------|-------------|---------------|--------|-----------|----------|----------|-------------|-------------|-------------|-------------|-------------|----------|-------------|-------------|-------------|-------------|-------------|
| Arh913    | 32/49/57 | 32/49/50/57 | 32/49/50/57 | 32   |               | 32/49/50/57 | 32/49/50 |      |        | 32/49/57    | 32/49/50/57 |               |        | 57        | 32       | 32/49/50 |             | 32/49       |             | 32/49/57    |             | 32/57    | 32/49/50/57 | 32          | 32/49/50/57 | 32/49/57    | 32/49/50    |
| Arh923    | 32/49/57 | 32/49/50/57 | 32/49/50/57 |      | 32/49/50/57 * | 32/49/50/57 | 32/49/50 |      |        | 32/49/50/57 | 32/49/50/57 |               | 57     | 32        | 32/49/50 |          |             | 32/49/50/57 |             | 32/49/57    |             | 32       | 32/49/50/57 | 32/49/50/57 | 32/49/50/57 | 32/49/57    | 32/49/50/57 |
| FujiP2    | 32/49/57 | 32/49/50/57 | 32/49/50/57 | 32   |               | 32/49/50/57 |          |      |        | 32/49/57    | 32/49/50/57 |               | 57     | 57        | 32/49/50 |          |             | 32/49/50/57 |             | 32/49/57    |             |          | 32/49/50/57 | 32/49/50/57 | 32/49/50/57 | 32/49/57    | 32/49/50/57 |
| Hiratsuka | 32/49/57 | 32/49/50/57 | 32/49/50/57 |      | 32/49/50/57 * | 32/49/50/57 |          | 32   |        | 32/49/50/57 | 32/49/50/57 |               | 57     | 32        | 32/49/50 |          |             | 32/49/50/57 |             | 32/49/50/57 |             |          | 32/49/50/57 | 32/49/50/57 | 32/49/50/57 | 32/49/57    | 32/49/50/57 |
| J-14      | 32/49/57 | 32/49/50/57 | 32/49/50/57 |      | 32/49/50/57 * | 32/49/50/57 |          |      |        | 32/49/57    | 32/49/50/57 |               | 57     | 57        | 32/49/50 |          |             | 32/49/50/57 |             | 32/49/50/57 |             | 32/50/57 | 32/49/50/57 | 32/49/50/57 | 32/49/50/57 | 32/49/57    | 32/49/50/57 |
| J-15      | 32/49/57 | 32/49/50/57 | 32/49/50/57 | 32   |               | 32/49/50/57 | 32/49/50 |      | 32/57  | 32/49/50/57 | 32/49/50/57 |               |        |           |          |          |             | 32/49/50/57 |             | 32/49/50/57 |             | 32       | 32/49       | 32/49/50/57 | 32/49/57    | 32/49/50/57 | 32/49/50/57 |
| J-20T     | 32/49/57 | 32/49/50/57 | 32/49/50/57 | 32   |               | 32/49/50/57 |          |      |        | 32/49/50/57 | 32/49/50/57 |               | 57     |           |          |          | 32/49/50/57 | 32/49/57    |             | 32/49/50/57 | 32/49/50/57 |          | 32/49       | 32/49/50/57 | 32/49/57    | 32/49/50/57 | 32/49/50/57 |
| Konnai17  | 32/49/57 | 32/49/50/57 | 32/49/50/57 |      | 32/49/50/57 * |             | 32/49    |      |        | 32/49/57    | 32/49/50/57 |               | 57     | 32 + 57 * |          |          | 32/49/50/57 | 32/49/57    |             | 32/49/57    |             | 32/50/57 | 32/49       | 32/49/50/57 | 32/49/50/57 | 32/49/57    | 32/49/50/57 |
| N346      | 32/49/57 | 32/49/50/57 | 32/49/50/57 | 32   |               | 32/49/50/57 |          |      |        | 32/49/57    | 32/49/50/57 |               |        |           | 32/49/50 |          |             | 32/49/50/57 |             | 32/49/57    | 32/50/57    | 32/49    | 32/49/50/57 | 32/49/50/57 | 32/49/50/57 | 32/49/57    | 32/49/50/57 |
| NT24      | 32/49/57 | 32/49/50/57 | 32/49/50/57 | 32   |               | 32/49/50/57 |          |      |        | 32/49/57    | 32/49/50/57 |               |        | 57        | 32/49/50 |          |             | 32/49/50/57 |             | 32/49/57    | 32/50/57    | 32/49    | 32/49/50/57 | 32/49/50/57 | 32/49/50/57 | 32/49/57    | 32/49/50/57 |
| Prrm7019  | 32/49/57 | 32/49/50/57 | 32/49/50/57 | 32   |               | 32/49/50/57 | 32/49/50 |      |        | 32/49/57    | 32/49/50/57 |               |        |           | 32/49/50 |          |             | 32/49/50/57 |             | 32/49/57    | 32/50/57    | 32/49    | 32/49/50/57 | 32/49/50/57 | 32/49/50/57 | 32/49/57    | 32/49/50/57 |
| Prrm7564  | 32/49/57 | 32/49/50/57 | 32/49/50/57 | 32   |               | 32/49/50/57 | 32/49/50 |      |        | 32/49/50/57 | 32/49/50/57 |               | 57     | 32        |          |          |             | 32/49/50/57 | 32/49/57    |             | 32/49/50/57 | 32       | 32/49/50    | 32/49/50/57 | 32/49/50/57 | 32/49/57    | 32/49/50/57 |
| Prrm7569  | 32/49/57 | 32/49/50/57 | 32/49/50/57 | 32   |               | 32/49/50/57 | 32/49/50 |      |        | 32/49/57    | 32/49/50/57 |               |        | 32        | 32/49/50 |          | 32/49/50/57 | 32/49/50/57 |             | 32/49/57    |             | 32       | 32/49/50    | 32/49/50/57 | 32/49/50/57 | 32/49/57    | 32/49/50/57 |
| Prrm965   | 32/49/57 | 32/49/50/57 | 32/49/50/57 | 32   |               | 32/49/57    |          |      |        | 32/49/57    | 32/49/50/57 |               |        |           | 32/49/50 |          | 32/49/50/57 | 32/49/50/57 | 32/49/50    | 32/49/57    |             | 32       | 32          | 32/49       | 32/49/50/57 | 32/49/57    | 32/49/50/57 |
| 61VB2     | 32/49/57 | 32/49/50/57 | 32/49/50/57 | 32   |               | 32/49/57    |          |      |        | 32/49/57    | 32/49/50/57 | 32/49/50/57   |        | 32        | 32/49/50 |          |             | 32/49/57    |             | 32/49/57    |             |          | 32/49/50/57 | 32/49/57    |             |             |             |
| A104S     | 32/49/57 | 32/49/50/57 | 32/49/50/57 | 32   |               | 32/49/57    |          |      |        | 32/49/57    | 32/49/50/57 | 32/49/50/57   |        | 32        | 32/49/50 |          |             | 32/49/57 *  |             | 32/49       |             |          | 32/49/50/57 | 32/49       |             | 32/49/50/57 | 32/49/57    |
| A91S      | 32/49/57 | 32/49/50/57 | 32/49/50/57 | 32   |               | 32/49/57    |          |      |        | 32/49/57    | 32/49/50/57 | 32/49/50/57   |        | 32        | 32/49/50 |          |             | 32/49/57    |             | 32/49/50/57 |             |          | 32/49/50/57 | 32/49/57    |             | 32/49/50/57 | 32/49/57    |
| DK6       | 32/49/57 | 32/49/50/57 | 32/49/50/57 | 32   |               | 32/49/57    |          |      |        | 32/49/57    | 32/49/50/57 | 32/49/50/57   |        | 32        | 32 50    |          |             | 32/49/57    |             | 32/49/57    |             |          | 32/49/50/57 | 32/49/57    |             | 32/49/50/57 | 32/49/57    |
| Lub125    | 32/49/57 | 32/49/50/57 | 32/49/50/57 | 32   |               | 32/49/57    |          |      |        | 32/49/57    | 32/49/50/57 | 32/49/50/57   |        | 32        | 32/49/50 |          |             | 32/49/57    |             | 32/49/57    |             |          | 32/49/50/57 | 32/49/57    |             | 32/49/50/57 | 32/49/57    |
| PBae I    | 32/49/57 | 32/49/50/57 | 32/49/50/57 | 32   |               | 32/49/57    |          |      |        | 32/49/57    | 32/49/50/57 | 32/49/50/57   |        | 32        | 32/49/50 |          |             | 32/49/57    |             | 32/49/57    |             |          | 32/49/50/57 | 32/49/57    |             | 32/49/50/57 | 32/49/57    |
| PBae II   | 32/49/57 | 32/49/50/57 | 32/49/50/57 | 32   |               | 32/49/57    |          |      |        | 32/49/57    | 32/49/50/57 | 32/49/50/57   |        | 32        | 32/49/50 |          |             | 32/49/57    |             | 32/49/57 *  |             |          | 32/49       | 32/49/50/57 |             | 32/49/50/57 | 32/49/57    |
| PBar      | 32/49/57 | 32/49/50/57 | 32/49/50/57 | 32   |               | 32/49/57    |          |      |        | 32/49/57    | 32/49/50/57 | 32/49/50/57   |        | 32        | 32/49/50 |          |             | 32/49/57    |             | 32/49/57    |             |          | 32/49/50/57 | 32/49/57    |             | 32/49/50/57 | 32/49/57    |
| PBi       | 32/49/57 | 32/49/50/57 | 32/49/50/57 | 32   |               | 32/49/57    |          |      |        | 32/49/57    | 32/49/50/57 | 32/49/50/57   |        | 32        | 50       |          | 32          | 32/49/57    |             | 32/49/57    |             |          | 32/49/50/57 | 32/49/57    |             | 32/49/50/57 | 32/49/57    |
| PBN       | 32/49/57 | 32/49/50/57 | 32/49/50/57 | 32   |               | 32/49/57    |          |      |        | 32/49/57    | 32/49/50/57 | 32/49/50/57   |        |           |          |          | 32          | 32/49/57    |             | 32/49/57    |             |          | 32/49/50/57 | 32/49/57    |             | 32/49/50/57 | 32/49/57    |
| PHer I    | 32/49/57 | 32/49/50/57 | 32/49/50/57 | 32   |               | 32/49/57    |          |      |        | 32/49/57    | 32/49/50/57 | 32/49/50/57   |        | 32        | 32/49/50 |          |             | 32/49/57    |             | 32/49/57    |             |          | 32/49/50/57 | 32/49/57    |             | 32/49/50/57 | 32/49/57    |
| PLad      | 32/49/57 | 32/49/50/57 | 32/49/50/57 | 32   |               | 32/49/57    |          |      |        | 32/49/57    | 32/49/50/57 | 32/49/50/57   |        |           |          |          | 32          | 32/49/57    |             | 32/49/57    |             |          | 32/49/50/57 | 32/49/57    |             | 32/49/50/57 | 32/49/57    |
| PNeb      | 32/49/57 | 32/49/50/57 | 32/49/50/57 | 32   |               | 32/49/57    |          |      |        | 32/49/57    | 32/49/50/57 | 32/49/50/57   |        |           |          |          | 32          | 32/49/57    |             | 32/49/57    |             |          | 32/49/50/57 | 32/49/57    |             | 32/49/50/57 | 32/49/57    |
| PNi       | 32/49/57 | 32/49/50/57 | 32/49/50/57 | 32   |               | 32/49/57    |          |      |        | 32/49/57    | 32/49/50/57 | 32/49/50/57   |        |           |          |          | 32          | 32/49/57    |             | 32/49/57    |             |          | 32/49/50/57 | 32/49/57    |             | 32/49/50/57 | 32/49/57    |
| PRab      | 32/49/57 | 32/49/50/57 | 32/49/50/57 | 32   |               | 32/49/57    |          |      |        | 32/49/57    | 32/49/50/57 | 32/49/50/57   |        | 32        | 32/49/50 |          |             | 32/49/57    |             | 32/49/57    |             |          | 32/49/50/57 | 32/49/57    |             | 32/49/50/57 | 32/49/57    |
| PRof      | 32/49/57 | 32/49/50/57 | 32/49/50/57 | 32   |               | 32/49/57    |          |      |        | 32/49/57    | 32/49/50/57 | 32/49/50/57   |        |           |          |          | 32          | 32/49/57    |             | 32/49/57    |             |          | 32/49/50/57 | 32/49/57    |             | 32/49/50/57 | 32/49/57    |
| PTrob     | 32/49/57 | 32/49/50/57 | 32/49/50/57 | 32   |               | 32/49/57    |          |      |        | 32/49/57    | 32/49/50/57 | 32/49/50/57   |        |           |          |          | 32          | 32/49/57    |             | 32/49/57    |             |          | 32/49/50/57 | 32/49/57    |             | 32/49/50/57 | 32/49/57    |
| PWin      | 32/49/57 | 32/49/50/57 | 32/49/50/57 | 32   |               | 32/49/57    |          |      |        | 32/49/57    | 32/49/50/57 | 32/49/50/57   |        |           |          |          |             | 32/49/57 *  |             | 32/49/57    |             |          | 32/49/50/57 | 32/49/57    |             | 32/49/50/57 | 32/49/57    |
| PZwi      | 32/49/57 | 32/49/50/57 | 32/49/50/57 | 32   |               | 32/49/57    |          |      |        | 32/49/57    | 32/49/50/57 | 32/49/50/57   |        |           |          |          |             | 32/49/57 *  |             | 32/49/57    |             |          | 32/49/50/57 | 32/49/57    |             | 32/49/50/57 | 32/49/57    |

### Supplementary Table 1. Plasmid partition genes identified in 33 *B. bavariensis* strains

Plasmid partition genes were searched for using BLAST v. 2.8.1 on assembled plasmids and on Illumina contigs. The queries were sequences from *B. burgdorferi* sensu stricto strains B31, BOL26, JD1, 118a and MM1 and *B. afzelii* PKo for PFM protein families 32, 49, 50 and 57. All hits on the *B. bavariensis* genomes were then subsequently used as query for a second BLAST run. Final hits that were shorter than half the original gene sequence were removed. Gray cells represent a reconstructed plasmid of at least 5 kb length (shown in Table 1).

\* specific cases:

lp17+lp28-4 fusion: lp17 part has only one PFM32 hit whereas the lp28-4 part has all four PFM;

lp28-3 PBar: the PFM32 hit was present but not full as stretched over two contigs;

lp28-7 Konnai17: Konnai17 has two lp28-7 plasmids, one carrying PFM32 and one PFM57;

cp32-3lp25: one European strain had no PFM49 for cp32-3 (A104S) and three others had two lp25 hits for PFM50 (PBae II, PWin, PZwi).

| Target     | Sense | Sequence (5'-3')      | Size (bp) | Tm (°C) | Product size (bp) |
|------------|-------|-----------------------|-----------|---------|-------------------|
| chromosome | F     | gaaagcaaggcaacaaggg   | 19        | 57      | 133               |
|            | R     | tgccctttgagcttacagaag | 21        | 59      |                   |
| cp26       | F     | tcacaccagaaaagtgcaagc | 20        | 58      | 130               |
|            | R     | cctcccattacgctcatttg  | 20        | 58      |                   |
| lp17       | F     | gaagggctaacggcactcaa  | 20        | 60      | 132               |
|            | R     | agatgtgaaggaggagcatca | 21        | 59      |                   |
| lp36       | F     | cgggtgcattagagcaggat  | 20        | 60      | 127               |
|            | R     | accaatagcaccccacgttt  | 20        | 58      |                   |

**Supplementary Table 2. Primers used for qPCR**
